# Supplementary material
Source: PubMed Central journal article supplement (PMC5713901)
Supplement: NIHMS908957-supplement-Supplemental.pdf [file NIHMS908957-supplement-Supplemental.pdf]

**Cancer Cell, Volume 31**

## **Supplemental Information**

### **Single-chromosome Gains Commonly**

#### **Function as Tumor Suppressors**

**Jason M. Sheltzer, Julie H. Ko, John M. Replogle, Nicole C. Habibe Burgos, Erica S. Chung, Colleen M. Meehl, Nicole M. Sayles, Verena Passerini, Zuzana Storchova, and Angelika Amon**

**A**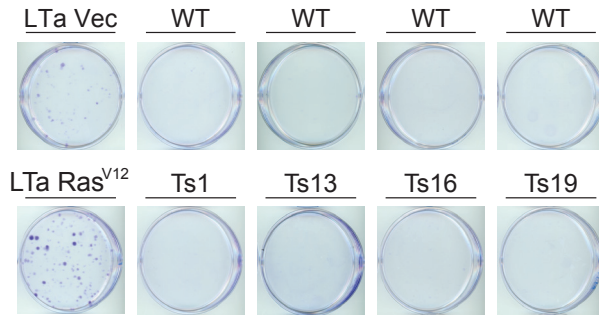**B**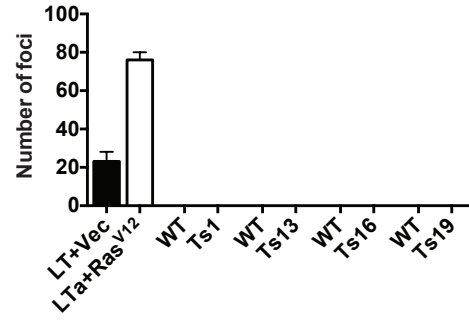**C**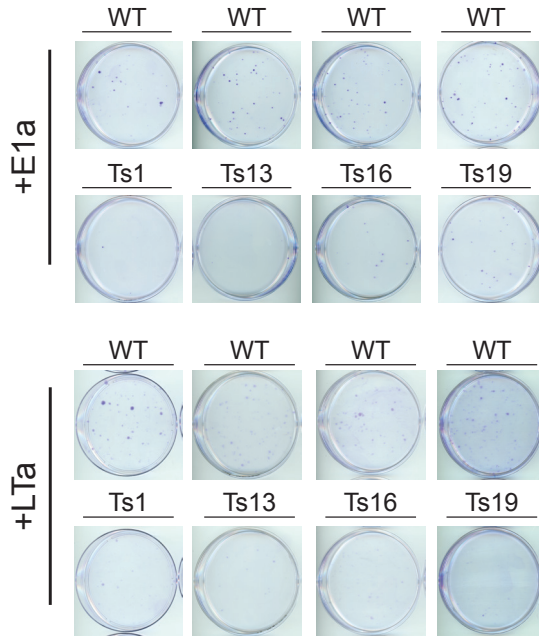**D**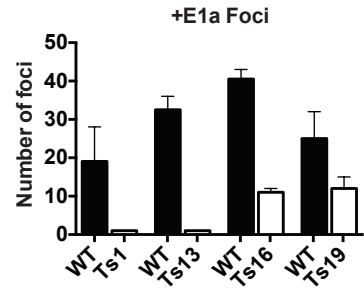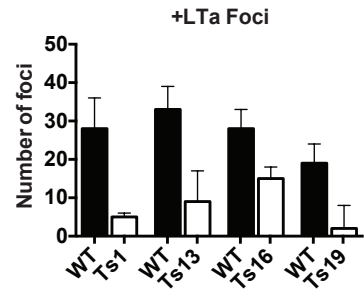**E**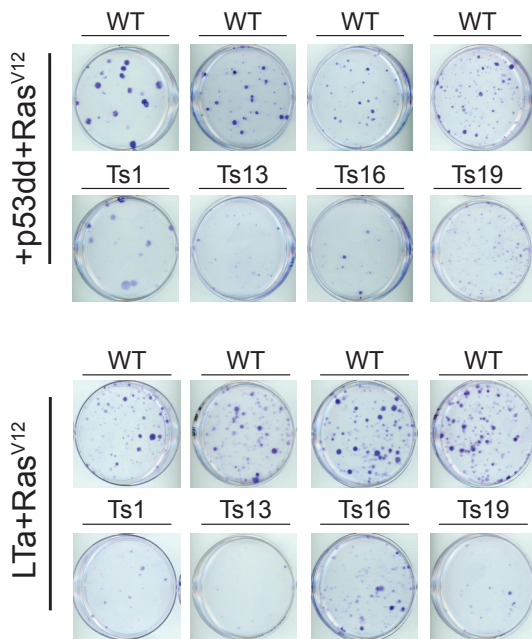**F**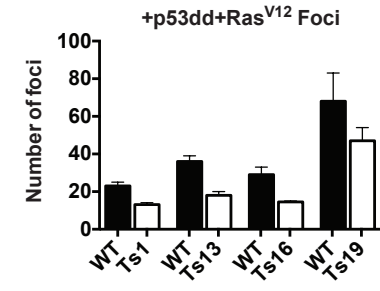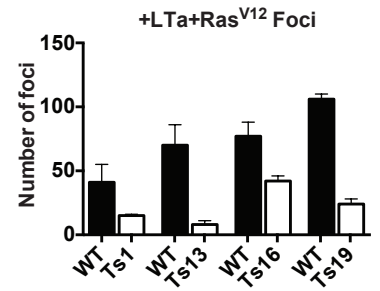

**Figure S1, related to Figure 1. Trisomic fibroblasts display limited clonogenicity**

(A) 1000 cells of the indicated cell lines were plated and grown for 10 days prior to staining with crystal violet. LTa-transduced MEFs are capable of forming colonies from single cells, but primary euploid and trisomic MEFs are non-clonogenic.

(B) Quantification of (A).

(C) Representative plates from a colony-formation assay of E1a or LTa-transduced MEFs.

(D) Quantification of (C).

(E) Representative plates from a colony-formation assay of Ras<sup>V12</sup>-transduced MEFs.

(F) Quantification of (E). Error bars indicate the standard error of the mean.

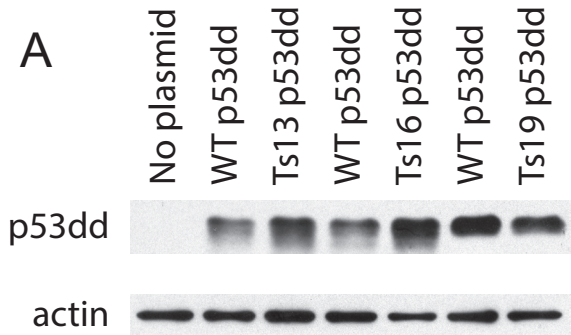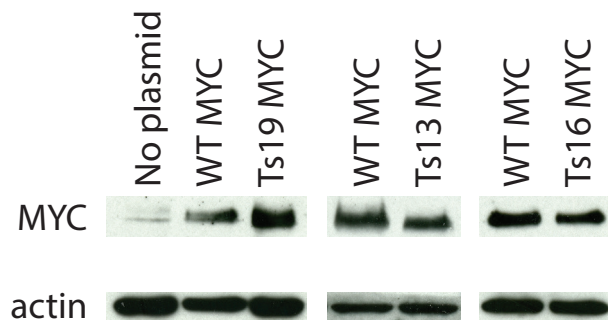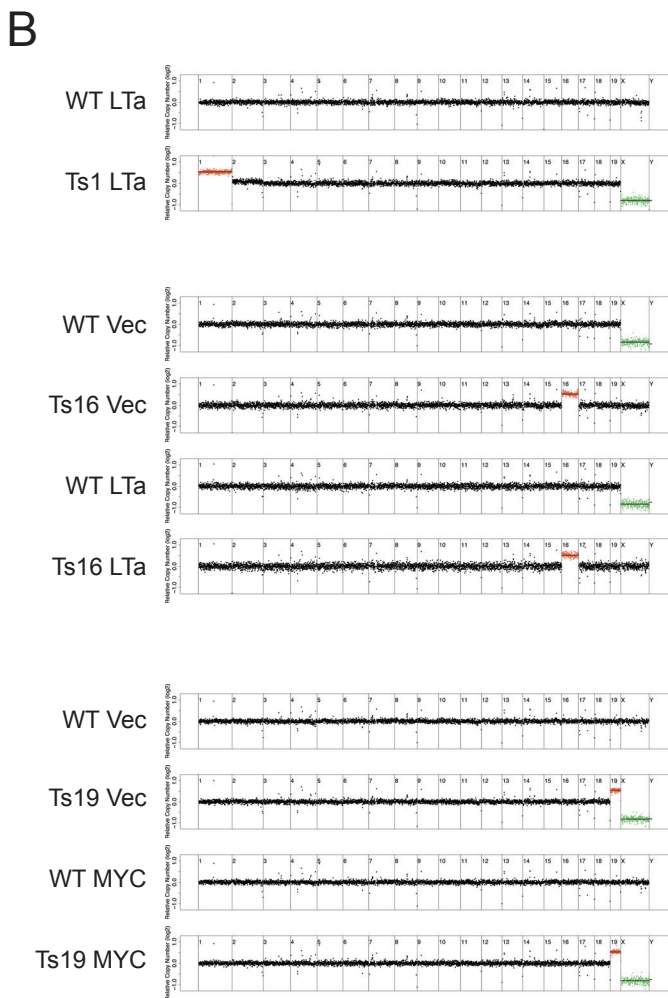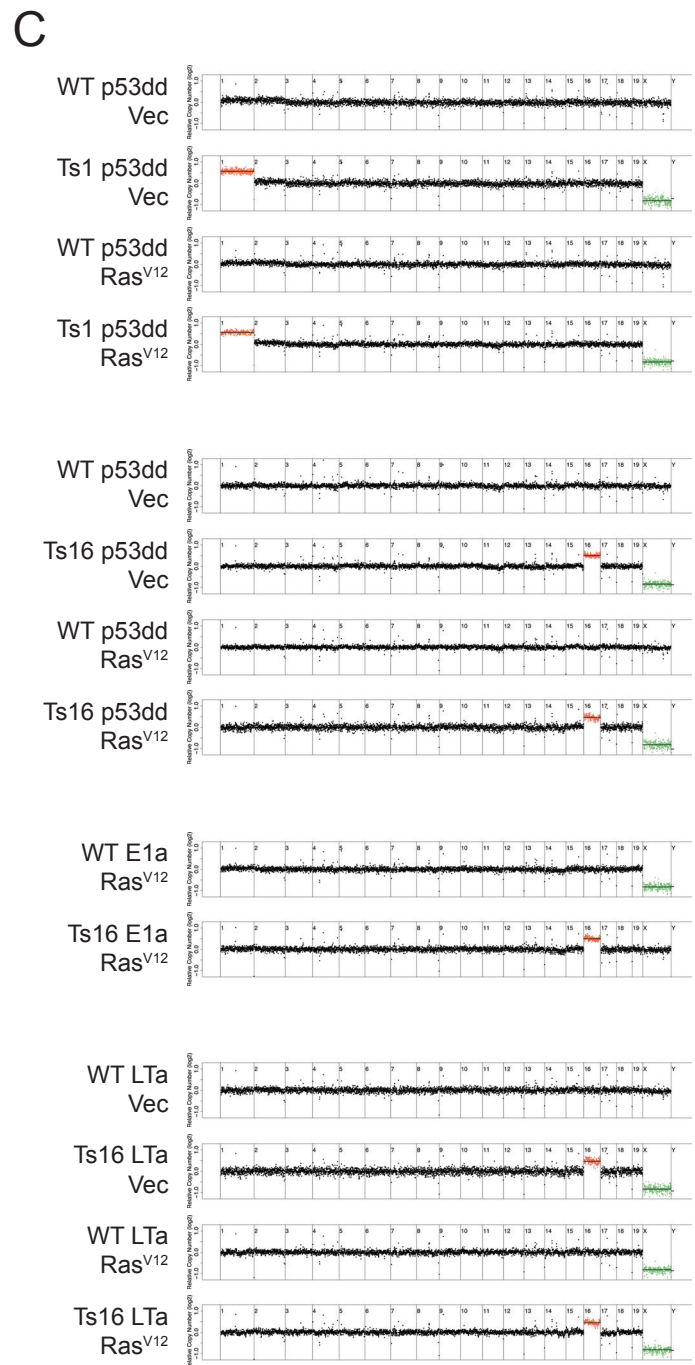

**Figure S2, related to Figure 1. Transduction of trisomic MEFs with oncogenes.**

(A) Western blot analysis of transgene expression levels in MEFs trisomic for mChr13, 16, or 19, transduced with p53dd or MYC.  $\beta$ -actin served as a loading control.

(B and C) Karyotypes of MEF lines that were transduced with (B) one oncogene or (C) two oncogenes were determined by low-pass whole genome sequencing. Note that the sequence results from the Ts1+p53dd+Ras<sup>V12</sup> and control cell lines are reproduced in Figure 7.

**Table S1, related to Figure 1. Oncogenes present on mouse chromosomes 1, 13, 16, and 19.†**

| <b>Chr.</b> | <b>Gene Symbol</b> | <b>Name</b>                                                                        |
|-------------|--------------------|------------------------------------------------------------------------------------|
| 1           | ELK4               | ELK4, ETS-domain protein (SRF accessory protein 1)                                 |
| 1           | FCGR2B             | Fc fragment of IgG, low affinity IIb, receptor for (CD32)                          |
| 1           | H3F3A              | H3 histone, family 3A                                                              |
| 1           | MDM4               | Mdm4 p53 binding protein homolog                                                   |
| 1           | PBX1               | pre-B-cell leukemia transcription factor 1                                         |
| 1           | SLC45A3            | solute carrier family 45, member 3                                                 |
| 1           | TPR                | translocated promoter region                                                       |
| 1           | CREB1              | cAMP responsive element binding protein 1                                          |
| 1           | FEV                | FEV protein - (HSRNAFEV)                                                           |
| 1           | IDH1               | isocitrate dehydrogenase 1 (NADP+), soluble                                        |
| 1           | PAX3               | paired box gene 3                                                                  |
| 1           | SF3B1              | splicing factor 3b, subunit 1, 155kDa                                              |
| 1           | NCOA2              | nuclear receptor coactivator 2 (TIF2)                                              |
| 1           | TCEA1              | transcription elongation factor A (SII), 1                                         |
| 1           | BCL2               | B-cell CLL/lymphoma 2                                                              |
| 1           | ABL2               | c-abl oncogene 2, non-receptor tyrosine kinase                                     |
| 1           | PMX1               | paired mesoderm homeo box 1                                                        |
| 1           | ACSL3              | acyl-CoA synthetase long-chain family member 3                                     |
| 1           | ATIC               | 5-aminoimidazole-4-carboxamide ribonucleotide formyltransferase/IMP cyclohydrolase |
| 1           | CMKOR1             | chemokine orphan receptor 1                                                        |
| 1           | LAF4               | lymphoid nuclear protein related to AF4                                            |
| 1           | FVT1               | follicular lymphoma variant translocation 1                                        |
| 1           | KDSR               | 3-ketodihydrosphingosine reductase [Source:MGI Symbol;Acc:MGI:1918000]             |
| 1           | LHX4               | LIM homeobox protein 4 [Source:MGI Symbol;Acc:MGI:101776]                          |
| 1           | FCGR3              | Fc receptor, IgG, low affinity III [Source:MGI Symbol;Acc:MGI:95500]               |
| 1           | CSNK2A1            | casein kinase 2, alpha 1 polypeptide [Source:MGI Symbol;Acc:MGI:88543]             |
| 13          | FGFR4              | fibroblast growth factor receptor 4                                                |
| 13          | IL6ST              | interleukin 6 signal transducer (gp130, oncostatin M receptor)                     |
| 13          | NSD1               | nuclear receptor binding SET domain protein 1                                      |
| 13          | TERT               | telomerase reverse transcriptase                                                   |
| 13          | DEK                | DEK oncogene (DNA binding)                                                         |
| 13          | IRF4               | interferon regulatory factor 4                                                     |
| 13          | TRIM27             | tripartite motif-containing 27                                                     |
| 13          | OMD                | osteomodulin                                                                       |
| 13          | HIST1H3B           | histone cluster 1, H3b                                                             |
| 13          | HIST1H4I           | histone 1, H4i (H4FM)                                                              |
| 13          | SYK                | spleen tyrosine kinase                                                             |
| 13          | NUTM2A             | NUT family member 2A                                                               |
| 13          | NUTM2B             | NUT family member 2B                                                               |
| 13          | NET1               | neuroepithelial cell transforming gene 1 [Source:MGI Symbol;Acc:MGI:1927138]       |

|           |          |                                                                                                   |
|-----------|----------|---------------------------------------------------------------------------------------------------|
| <b>13</b> | RASA1    | RAS p21 protein activator 1 [Source:MGI Symbol;Acc:MGI:97860]                                     |
| <b>13</b> | SPZ1     | Spermatogenic leucine zipper protein 1 (BHLH-Zip transcription factor SPZ1) (Spermatogenic Zip 1) |
| <b>16</b> | BCL6     | B-cell CLL/lymphoma 6                                                                             |
| <b>16</b> | EIF4A2   | eukaryotic translation initiation factor 4A, isoform 2                                            |
| <b>16</b> | ETV5     | ets variant gene 5                                                                                |
| <b>16</b> | LPP      | LIM domain containing preferred translocation partner in lipoma                                   |
| <b>16</b> | TFG      | TRK-fused gene                                                                                    |
| <b>16</b> | TFRC     | transferrin receptor (p90, CD71)                                                                  |
| <b>16</b> | CIITA    | class II, major histocompatibility complex, transactivator                                        |
| <b>16</b> | MYH11    | myosin, heavy polypeptide 11, smooth muscle                                                       |
| <b>16</b> | TNFRSF17 | tumor necrosis factor receptor superfamily, member 17                                             |
| <b>16</b> | ERG      | v-ets erythroblastosis virus E26 oncogene like (avian)                                            |
| <b>16</b> | OLIG2    | oligodendrocyte lineage transcription factor 2 (BHLHB1)                                           |
| <b>16</b> | RUNX1    | runt-related transcription factor 1 (AML1)                                                        |
| <b>16</b> | TMPRSS2  | transmembrane protease, serine 2                                                                  |
| <b>16</b> | C16orf75 | chromosome 16 open reading frame 75                                                               |
| <b>16</b> | RUNDC2A  | RUN domain containing 2A                                                                          |
| <b>16</b> | BCL5     | B-cell CLL/lymphoma 5                                                                             |
| <b>16</b> | PNUTL1   | peanut-like 1 (Drosophila)                                                                        |
| <b>16</b> | IGL      | immunoglobulin lambda locus                                                                       |
| <b>16</b> | LITAF    | LPS-induced TN factor [Source:MGI Symbol;Acc:MGI:1929512]                                         |
| <b>16</b> | ETS2     | E26 avian leukemia oncogene 2, 3' domain [Source:MGI Symbol;Acc:MGI:95456]                        |
| <b>19</b> | CD274    | CD274 molecule                                                                                    |
| <b>19</b> | GNAQ     | guanine nucleotide binding protein (G protein), q polypeptide                                     |
| <b>19</b> | JAK2     | Janus kinase 2                                                                                    |
| <b>19</b> | NFKB2    | nuclear factor of kappa light polypeptide gene enhancer in B-cells 2 (p49/p100)                   |
| <b>19</b> | NT5C2    | 5'-nucleotidase, cytosolic II                                                                     |
| <b>19</b> | TCF7L2   | transcription factor 7-like 2                                                                     |
| <b>19</b> | TLX1     | T-cell leukemia, homeobox 1 (HOX11)                                                               |
| <b>19</b> | VTI1A    | vesicle transport through interaction with t-SNAREs homolog 1A                                    |
| <b>19</b> | MALAT1   | metastasis associated lung adenocarcinoma transcript 1 ( lnc-RNA; non-protein coding)             |
| <b>19</b> | CD273    | programmed cell death 1 ligand 2                                                                  |
| <b>19</b> | KIAA1598 | KIAA1598                                                                                          |
| <b>19</b> | MXI1     | Max interacting protein 1 [Source:MGI Symbol;Acc:MGI:97245]                                       |

† Data are derived from the Sanger Cancer Genome Census and the Uniprot list of proto-oncogenes.

A

Ts13

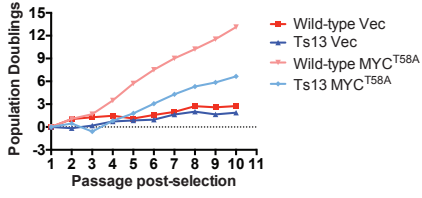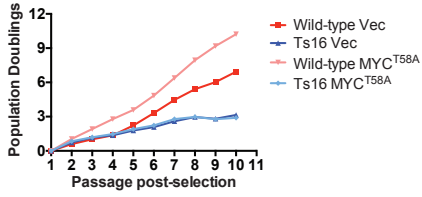

Ts16

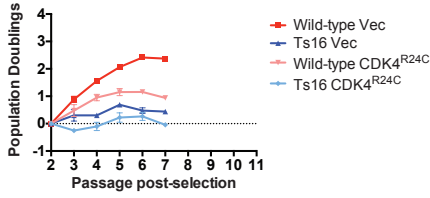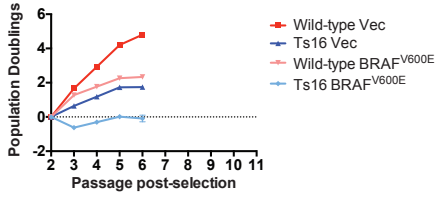

B

Ts13

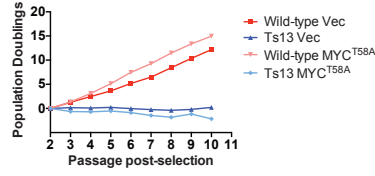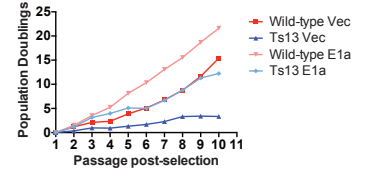

Ts16

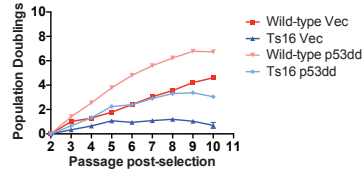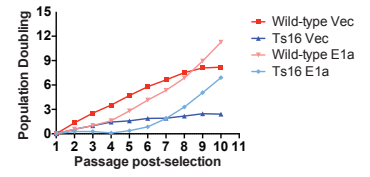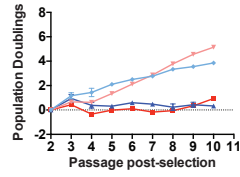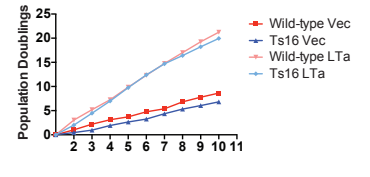

Ts19

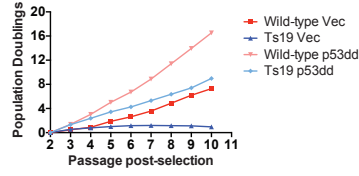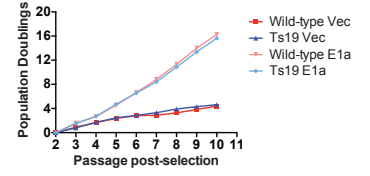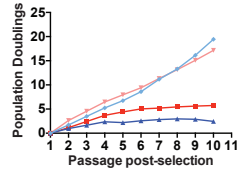



**Figure S3, related to Figure 2. Additional single-oncogene experiments in trisomic and euploid fibroblasts.**

(A) Euploid and trisomic cell lines were transduced with plasmids harboring the indicated oncogene or a matched empty vector. Following selection, the cell lines were passaged every third day for up to 10 passages, and the cumulative population doublings were determined. Experiments with BRAF<sup>V600E</sup> and CDK4<sup>R24C</sup> were terminated prematurely as both euploid and trisomic cells senesced following transduction.

(B) Nine single-oncogene transduction experiments were repeated in different, independently-derived cell lines. These lines were stably transduced with plasmids harboring the indicated oncogene(s) or a matched empty vector, and then passaged every third day for up to 10 passages. Some variability exists between replicates (e.g., compare Ts16+MYC in Figure S3B and Figure 2A), but no trisomy+oncogene combination was found to consistently outgrow a matched euploid line across multiple cell lines. Note that the panel displaying Ts19+LTa is reproduced in Figure S7.

**A**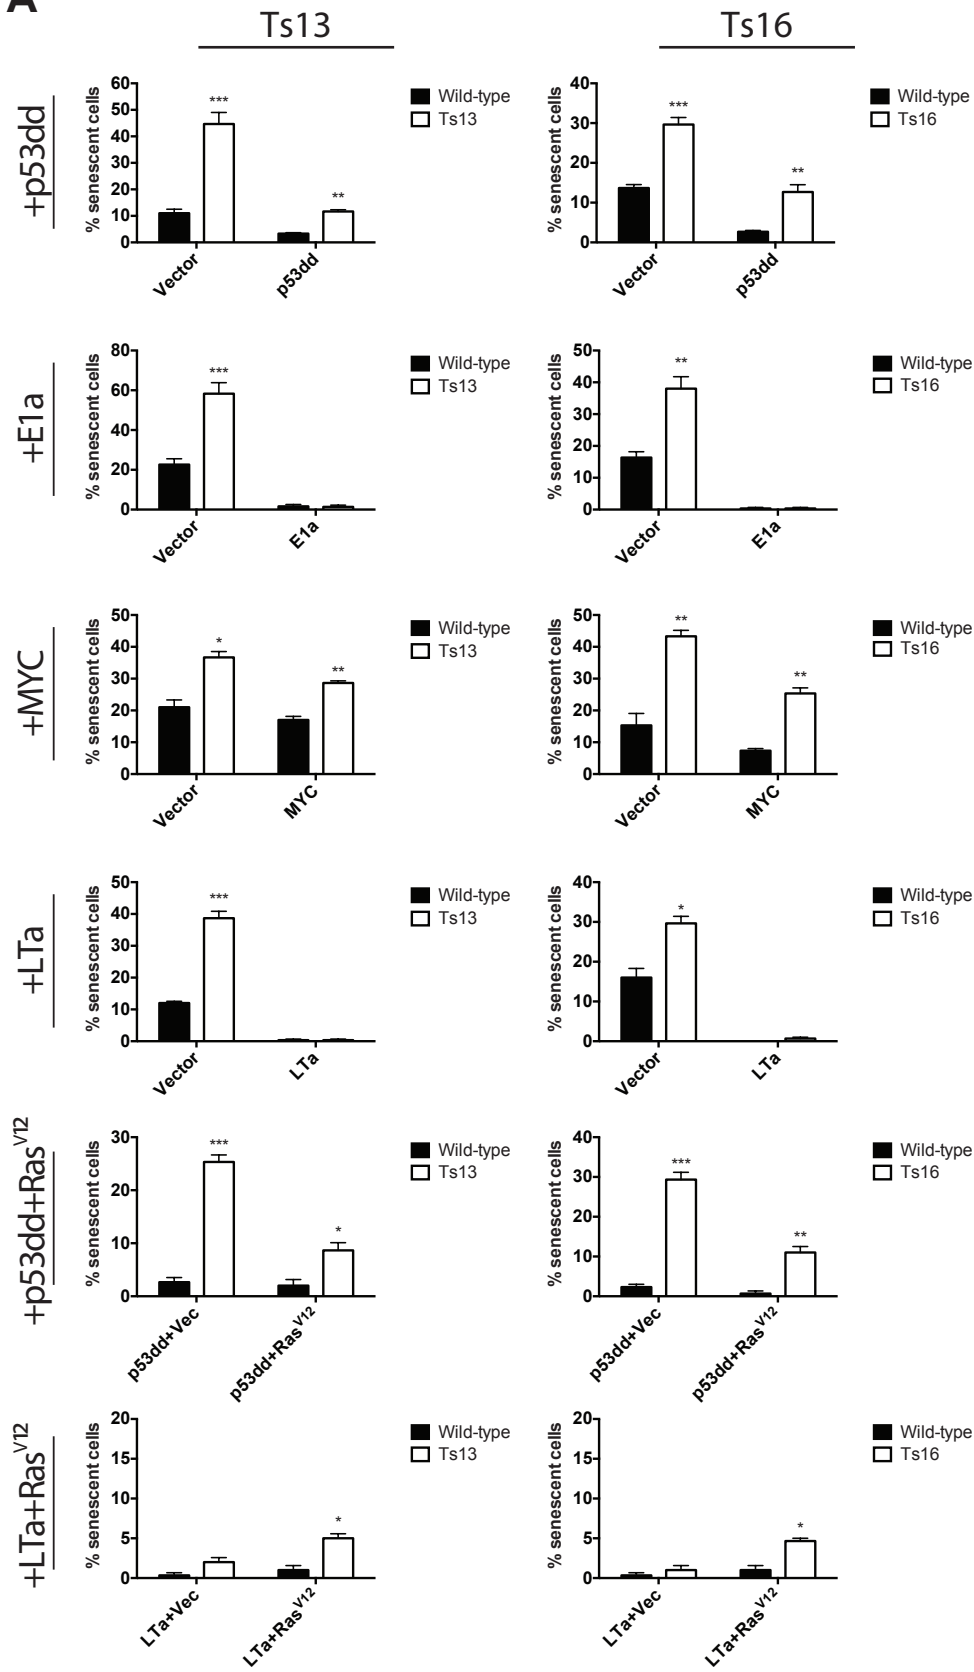**B**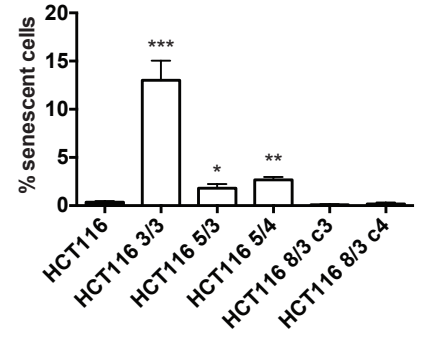

**Figure S4, related to Figure 2. Trisomic cells display elevated levels of senescence-associated  $\beta$ -galactosidase.**

At passage 6-8 in culture, the indicated cells were plated and stained for the expression of  $\beta$ -galactosidase. At least 200 cells in three wells were counted for each experiment. \*,  $p < .05$ ; \*\*,  $p < .005$ ; \*\*\*,  $p < .0005$  (Student's t test). Error bars indicate the standard error of the mean.

A

Ts13

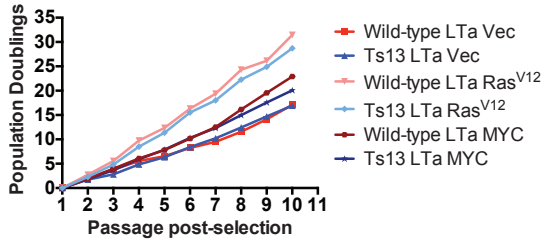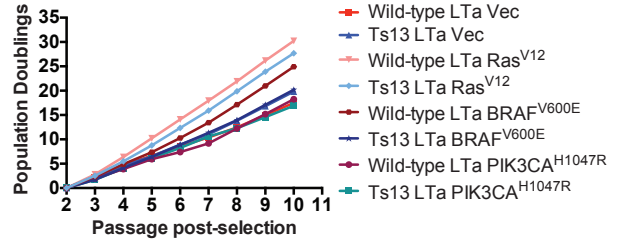

Ts16

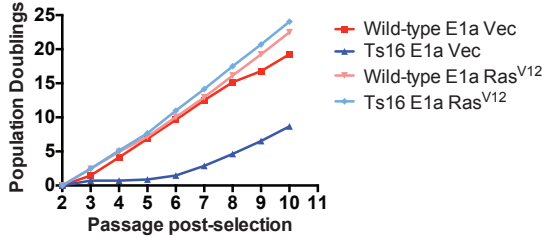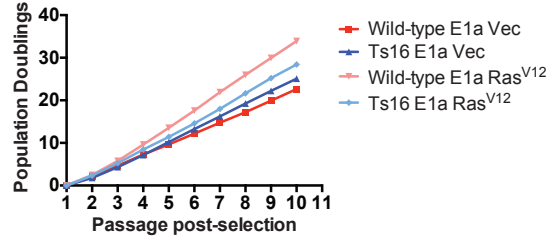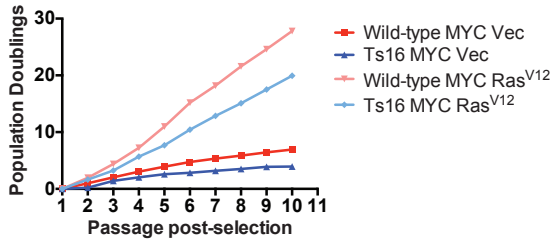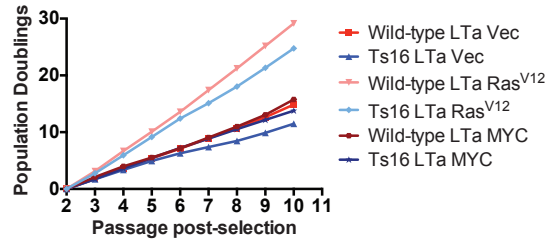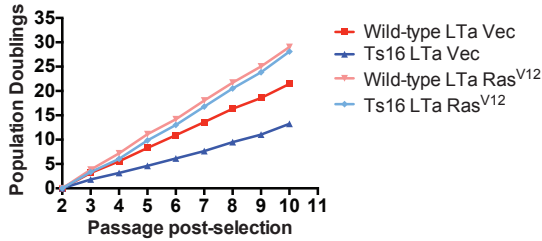

Ts19

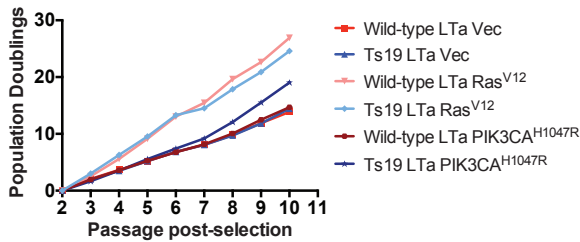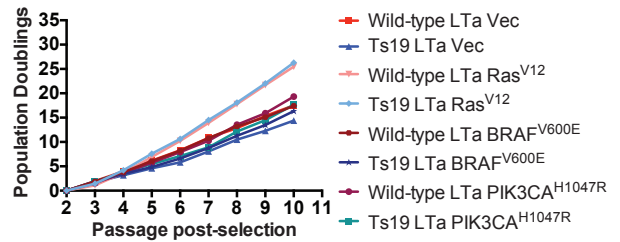

B

Ras<sup>V12</sup> Growth Enhancement (+MYC)

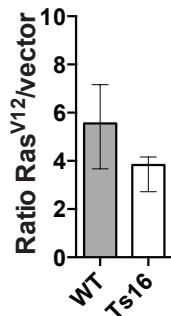

Ras<sup>V12</sup> Growth Enhancement (+E1a)

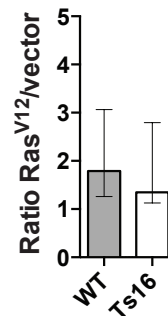

**Figure S5, related to Figure 3. Additional double-oncogene cocktails and replicate experiments in trisomic MEFs.**

(A) Euploid and trisomic cell lines were stably transduced with plasmids harboring the indicated oncogene or a matched empty vector. Following selection, the cell lines were passaged every third day for up to 10 passages, and the cumulative population doublings over the course of each experiment are displayed. Note that one replicate of Ts13+LTA+Vec and +Ras<sup>V12</sup> and one replicate of Ts19+LTa+Vec and +Ras<sup>V12</sup> are also presented in Figure 3A; these growth assays were conducted in parallel with growth assays in cells that harbor BRAF<sup>V600E</sup> or PIK3CA<sup>H1047R</sup> and are therefore shown here for comparison. Both Ts19+LTa experiments are also reproduced in Figure S7.

(B) The number of cells recovered from MYC+Ras<sup>V12</sup>-transduced and E1a+ Ras<sup>V12</sup>-transduced MEFs was divided by the number of cells recovered from vector-transduced MEFs at every passage. Bar graphs display the median ratios and the interquartile ranges. \* p<.05; \*\*\* p<.0005 (Wilcoxon rank-sum test).

A

Line 1 Rep 1

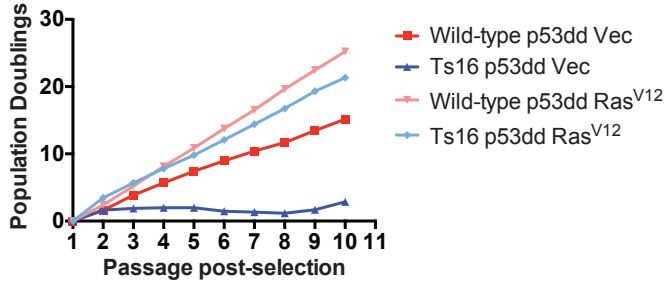

Line 1 Rep 2

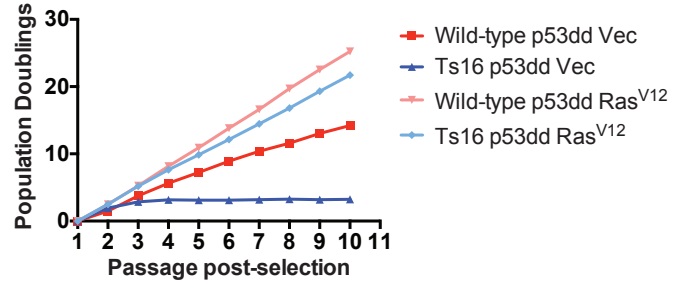

B

Line 2

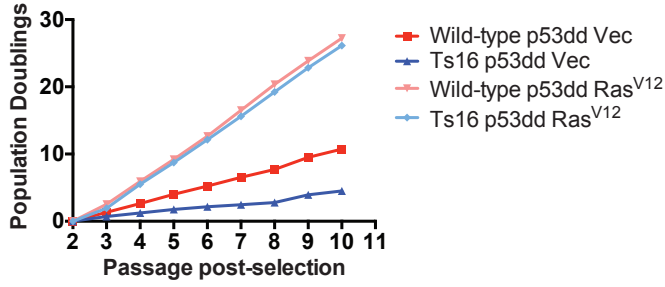

Line 3

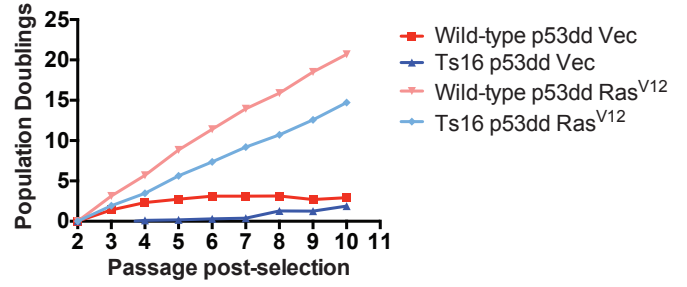

Line 4

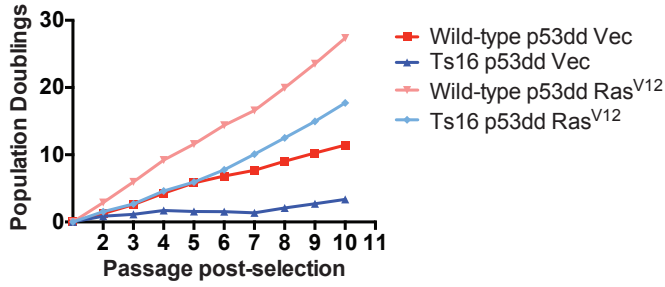

Line 5

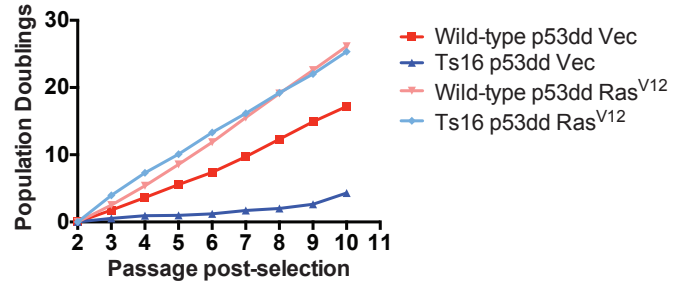

**Figure S6, related to Figure 3. Replicate growth curves of the same or of independently-derived Ts16 cells that express p53dd and Ras<sup>V12</sup>.**

(A) The same WT and Ts16 MEF lines were stably transduced with plasmids harboring the indicated oncogene or a matched empty vector. Following selection, the cell lines were passaged every third day for up to 10 passages, and the cumulative population doublings over the course of each experiment are displayed. Note that Line 1 Rep 1 is also displayed in Figure 2A.

(B) Four independently derived pairs of WT or Ts16 MEFs were transduced and passaged as described above. Error bars indicate the standard error of the mean.

**Table S2, related to Figure 5. Oncogenes present on human chromosomes 3, 5, and 8.†**

| Chr. | Gene Symbol | Name                                                                                                                                                                                                                                                                                                                                                                                     |
|------|-------------|------------------------------------------------------------------------------------------------------------------------------------------------------------------------------------------------------------------------------------------------------------------------------------------------------------------------------------------------------------------------------------------|
| 3    | BCL6        | B-cell CLL/lymphoma 6                                                                                                                                                                                                                                                                                                                                                                    |
| 3    | CTNNB1      | catenin (cadherin-associated protein), beta 1                                                                                                                                                                                                                                                                                                                                            |
| 3    | CCNL1       | Cyclin-L1 (Cyclin-L)                                                                                                                                                                                                                                                                                                                                                                     |
| 3    | DCUN1D1     | DCN1-like protein 1 (DCUN1 domain-containing protein 1) (Defective in cullin neddylation protein 1-like protein 1) (Squamous cell carcinoma-related oncogene)                                                                                                                                                                                                                            |
| 3    | EVI1        | ecotropic viral integration site 1                                                                                                                                                                                                                                                                                                                                                       |
| 3    | ETV5        | ets variant gene 5                                                                                                                                                                                                                                                                                                                                                                       |
| 3    | EIF4A2      | eukaryotic translation initiation factor 4A, isoform 2                                                                                                                                                                                                                                                                                                                                   |
| 3    | FOXL2       | forkhead box L2                                                                                                                                                                                                                                                                                                                                                                          |
| 3    | FOXP1       | forkhead box P1                                                                                                                                                                                                                                                                                                                                                                          |
| 3    | FHIT        | fragile histidine triad gene                                                                                                                                                                                                                                                                                                                                                             |
| 3    | GATA2       | GATA binding protein 2                                                                                                                                                                                                                                                                                                                                                                   |
| 3    | GMPS        | guanine monphosphate synthetase                                                                                                                                                                                                                                                                                                                                                          |
| 3    | LPP         | LIM domain containing preferred translocation partner in lipoma                                                                                                                                                                                                                                                                                                                          |
| 3    | MECOM       | MDS1 and EVI1 complex locus protein EVI1 (Ecotropic virus integration site 1 protein homolog) (EVI-1)                                                                                                                                                                                                                                                                                    |
| 3    | MITF        | microphthalmia-associated transcription factor                                                                                                                                                                                                                                                                                                                                           |
| 3    | MDS1        | myelodysplasia syndrome 1                                                                                                                                                                                                                                                                                                                                                                |
| 3    | MYD88       | myeloid differentiation primary response gene (88)                                                                                                                                                                                                                                                                                                                                       |
| 3    | MLF1        | myeloid leukemia factor 1                                                                                                                                                                                                                                                                                                                                                                |
| 3    | NCKIPSD     | NCK-interacting protein with SH3 domain (54 kDa VacA-interacting protein) (54 kDa vimentin-interacting protein) (VIP54) (90 kDa SH3 protein interacting with Nck) (AF3p21) (Dia-interacting protein 1) (DIP-1) (Diaphanous protein-interacting protein) (SH3 adapter protein SPIN90) (WASP-interacting SH3-domain protein) (WISH) (Wiskott-Aldrich syndrome protein-interacting protein) |
| 3    | PPARG       | peroxisome proliferative activated receptor, gamma                                                                                                                                                                                                                                                                                                                                       |
| 3    | PIK3CA      | phosphoinositide-3-kinase, catalytic, alpha polypeptide                                                                                                                                                                                                                                                                                                                                  |
| 3    | PRKCI       | Protein kinase C iota type (EC 2.7.11.13) (Atypical protein kinase C-lambda/iota) (PRKC-lambda/iota) (aPKC-lambda/iota) (nPKC-iota)                                                                                                                                                                                                                                                      |
| 3    | RHOA        | ras homolog family member A                                                                                                                                                                                                                                                                                                                                                              |
| 3    | RARB        | Retinoic acid receptor beta (RAR-beta) (HBV-activated protein) (Nuclear receptor subfamily 1 group B member 2) (RAR-epsilon)                                                                                                                                                                                                                                                             |
| 3    | RPN1        | ribophorin I                                                                                                                                                                                                                                                                                                                                                                             |
| 3    | AF3p21      | SH3 protein interacting with Nck, 90 kDa (ALL1 fused gene from 3p21)                                                                                                                                                                                                                                                                                                                     |
| 3    | SRGAP3      | SLIT-ROBO Rho GTPase activating protein 3                                                                                                                                                                                                                                                                                                                                                |
| 3    | SOX2        | SRY (sex determining region Y)-box 2                                                                                                                                                                                                                                                                                                                                                     |
| 3    | TCTA        | T-cell leukemia translocation-altered gene protein (T-cell leukemia translocation-associated gene protein)                                                                                                                                                                                                                                                                               |



|          |          |                                                                                                                                                                                                             |
|----------|----------|-------------------------------------------------------------------------------------------------------------------------------------------------------------------------------------------------------------|
| <b>3</b> | TFRC     | transferrin receptor (p90, CD71)                                                                                                                                                                            |
| <b>3</b> | TFG      | TRK-fused gene                                                                                                                                                                                              |
| <b>3</b> | USP4     | Ubiquitin carboxyl-terminal hydrolase 4 (EC 3.4.19.12) (Deubiquitinating enzyme 4) (Ubiquitin thioesterase 4) (Ubiquitin-specific-processing protease 4) (Ubiquitous nuclear protein homolog)               |
| <b>3</b> | RAF1     | v-raf-1 murine leukemia viral oncogene homolog 1                                                                                                                                                            |
| <b>3</b> | WWTR1    | WW domain containing transcription regulator 1                                                                                                                                                              |
| <b>3</b> | ZNF9     | zinc finger protein 9 (a cellular retroviral nucleic acid binding protein)                                                                                                                                  |
| <b>5</b> | AFF4     | AF4/FMR2 family member 4 (ALL1-fused gene from chromosome 5q31 protein) (Protein AF-5q31) (Major CDK9 elongation factor-associated protein)                                                                 |
| <b>5</b> | AF5q31   | ALL1 fused gene from 5q31                                                                                                                                                                                   |
| <b>5</b> | CD74     | CD74 molecule, major histocompatibility complex, class II invariant chain                                                                                                                                   |
| <b>5</b> | EBF1     | early B-cell factor 1                                                                                                                                                                                       |
| <b>5</b> | FACL6    | fatty-acid-coenzyme A ligase, long-chain 6                                                                                                                                                                  |
| <b>5</b> | FGFR4    | fibroblast growth factor receptor 4                                                                                                                                                                         |
| <b>5</b> | GRAF     | GTPase regulator associated with focal adhesion kinase pp125(FAK)                                                                                                                                           |
| <b>5</b> | ITK      | IL2-inducible T-cell kinase                                                                                                                                                                                 |
| <b>5</b> | IL6ST    | interleukin 6 signal transducer (gp130, oncostatin M receptor)                                                                                                                                              |
| <b>5</b> | IL7R     | interleukin 7 receptor                                                                                                                                                                                      |
| <b>5</b> | LIFR     | leukemia inhibitory factor receptor                                                                                                                                                                         |
| <b>5</b> | CSF1R    | Macrophage colony-stimulating factor 1 receptor (CSF-1 receptor) (CSF-1-R) (CSF-1R) (M-CSF-R) (EC 2.7.10.1) (Proto-oncogene c-Fms) (CD antigen CD115)                                                       |
| <b>5</b> | NSD1     | nuclear receptor binding SET domain protein 1                                                                                                                                                               |
| <b>5</b> | NPM1     | nucleophosmin (nucleolar phosphoprotein B23, numatrin)                                                                                                                                                      |
| <b>5</b> | PDGFRB   | platelet-derived growth factor receptor, beta polypeptide                                                                                                                                                   |
| <b>5</b> | PWWP2A   | PWWP domain containing 2A                                                                                                                                                                                   |
| <b>5</b> | RANBP17  | RAN binding protein 17                                                                                                                                                                                      |
| <b>5</b> | RASA1    | Ras GTPase-activating protein 1 (GAP) (GTPase-activating protein) (RasGAP) (Ras p21 protein activator) (p120GAP)                                                                                            |
| <b>5</b> | ARHGAP26 | Rho GTPase-activating protein 26 (GTPase regulator associated with focal adhesion kinase) (Oligophrenin-1-like protein) (Rho-type GTPase-activating protein 26)                                             |
| <b>5</b> | PTTG1    | Securin (Esp1-associated protein) (Pituitary tumor-transforming gene 1 protein) (Tumor-transforming protein 1) (hPTTG)                                                                                      |
| <b>5</b> | TLX3     | T-cell leukemia, homeobox 3 (HOX11L2)                                                                                                                                                                       |
| <b>5</b> | TERT     | telomerase reverse transcriptase                                                                                                                                                                            |
| <b>5</b> | FER      | Tyrosine-protein kinase Fer (EC 2.7.10.2) (Feline encephalitis virus-related kinase FER) (Fujinami poultry sarcoma/Feline sarcoma-related protein Fer) (Proto-oncogene c-Fer) (Tyrosine kinase 3) (p94-Fer) |
| <b>8</b> | CHCHD7   | coiled-coil-helix-coiled-coil-helix domain containing 7                                                                                                                                                     |
| <b>8</b> | CBFA2T1  | core-binding factor, runt domain, alpha subunit 2;translocated to, 1 (ETO)                                                                                                                                  |

|   |         |                                                                                                                                                                                                                            |
|---|---------|----------------------------------------------------------------------------------------------------------------------------------------------------------------------------------------------------------------------------|
| 8 | COX6C   | cytochrome c oxidase subunit VIc                                                                                                                                                                                           |
| 8 | EIF3E   | eukaryotic translation initiation factor 3, subunit E                                                                                                                                                                      |
| 8 | FGFR1   | fibroblast growth factor receptor 1                                                                                                                                                                                        |
| 8 | HEY1    | hairy/enhancer-of-split related with YRPW motif 1                                                                                                                                                                          |
| 8 | KAT6A   | Histone acetyltransferase KAT6A (EC 2.3.1.48) (MOZ, YBF2/SAS3, SAS2 and TIP60 protein 3) (MYST-3) (Monocytic leukemia zinc finger protein) (Runt-related transcription factor-binding protein 2) (Zinc finger protein 220) |
| 8 | HOOK3   | hook homolog 3                                                                                                                                                                                                             |
| 8 | IKBKB   | inhibitor of kappa light polypeptide gene enhancer in B-cells, kinase beta                                                                                                                                                 |
| 8 | NRG1    | neuregulin 1                                                                                                                                                                                                               |
| 8 | NDRG1   | N-myc downstream regulated 1                                                                                                                                                                                               |
| 8 | NCOA2   | nuclear receptor coactivator 2 (TIF2)                                                                                                                                                                                      |
| 8 | PCM1    | pericentriolar material 1 (PTC4)                                                                                                                                                                                           |
| 8 | PLAG1   | pleiomorphic adenoma gene 1                                                                                                                                                                                                |
| 8 | RUNX1T1 | Protein CBFA2T1 (Cyclin-D-related protein) (Eighty one protein) (Protein ETO) (Protein MTG8) (Zinc finger MYND domain-containing protein 2)                                                                                |
| 8 | MOS     | Proto-oncogene serine/threonine-protein kinase mos (EC 2.7.11.1) (Oocyte maturation factor mos) (Proto-oncogene c-Mos)                                                                                                     |
| 8 | RSPO2   | R-spondin 2                                                                                                                                                                                                                |
| 8 | RUNXBP2 | runt-related transcription factor binding protein 2 (MOZ/ZNF220)                                                                                                                                                           |
| 8 | TCEA1   | transcription elongation factor A (SII), 1                                                                                                                                                                                 |
| 8 | MAFA    | Transcription factor MafA (Pancreatic beta-cell-specific transcriptional activator) (Transcription factor RIPE3b1) (V-maf musculoaponeurotic fibrosarcoma oncogene homolog A)                                              |
| 8 | LYN     | Tyrosine-protein kinase Lyn (EC 2.7.10.2) (Lck/Yes-related novel protein tyrosine kinase) (V-yes-1 Yamaguchi sarcoma viral related oncogene homolog) (p53Lyn) (p56Lyn)                                                     |
| 8 | MYC     | v-myc myelocytomatosis viral oncogene homolog (avian)                                                                                                                                                                      |
| 8 | WISP1   | WNT1-inducible-signaling pathway protein 1 (WISP-1) (CCN family member 4) (Wnt-1-induced secreted protein)                                                                                                                 |
| 8 | WHSC1L1 | Wolf-Hirschhorn syndrome candidate 1-like 1 (NSD3)                                                                                                                                                                         |

† Data are derived from the Sanger Cancer Genome Census and the Uniprot list of proto-oncogenes.

A

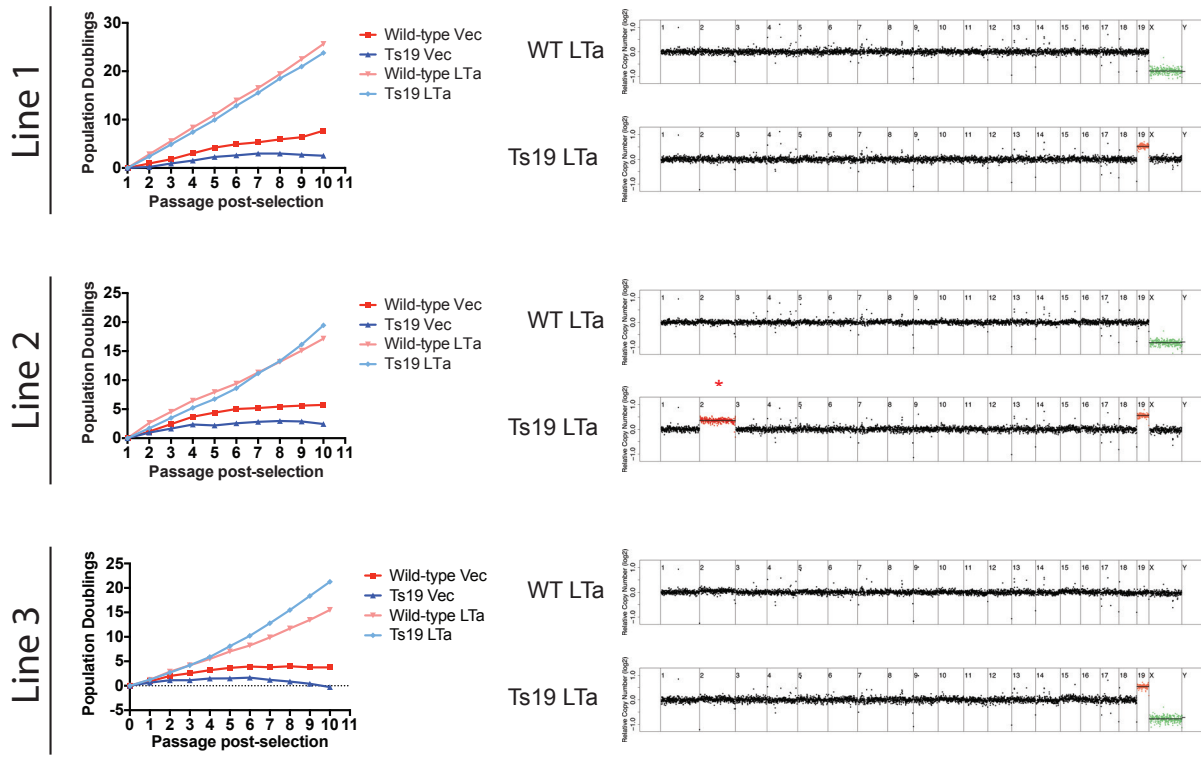

B

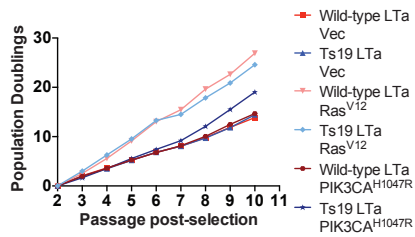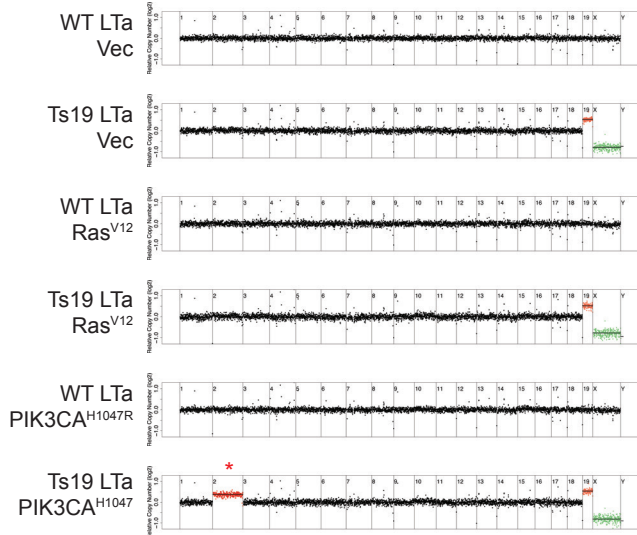

C

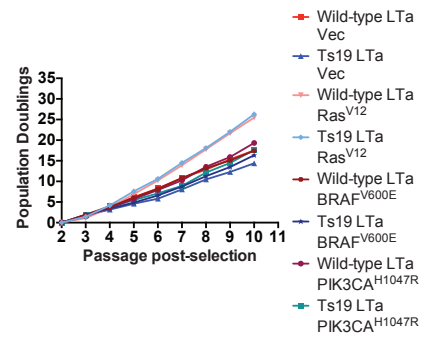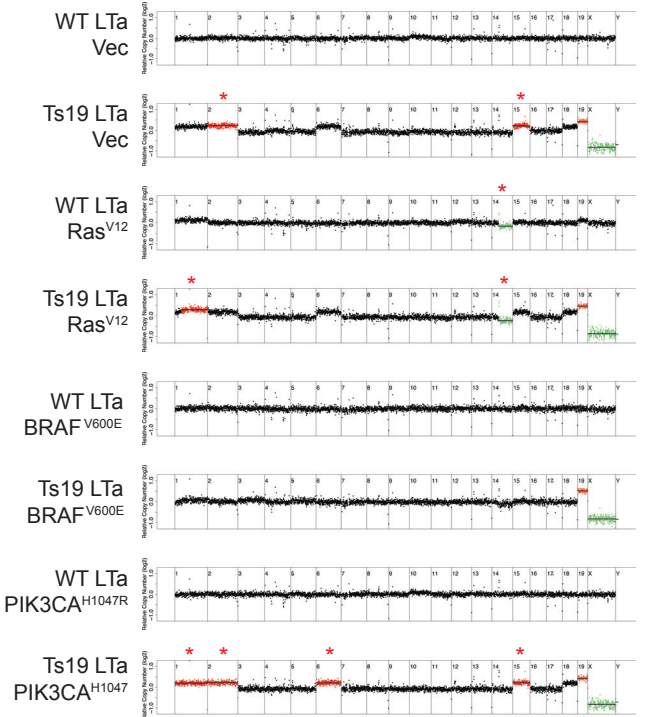

**Figure S7, related to Figure 7. Analysis of Ts19 MEF lines transduced with LTa.**

(A) Ts19 MEF lines and matched euploid control cell lines were transduced with LTa or with an empty vector and then passaged every third day for up to 10 passages. Lines 2 and 3 exhibited a growth inflection after several passages and overtook the wild-type cells. Sequence analysis at late passage revealed an extra copy of chromosome 2 (indicated with an asterisk) in the second Ts19 line. Note that line 1 is also displayed in Figure 2A, and line 2 is also displayed in Figure S3. Deviations from each cell line's initial karyotype are indicated with an asterisk.

(B) Ts19 cell line and a matched euploid control cell line were transduced with Large T, and then transduced a second time with an empty vector, Ras<sup>V12</sup>, or PIK3CA<sup>H1047R</sup>. The Ts19+LTa+PIK3CA<sup>H1047R</sup> cell line grew more rapidly than an equivalently-transduced euploid line. Sequencing at passage 10 revealed that the Ts19+LTa+PIK3CA<sup>H1047R</sup> line had acquired an extra copy of chromosome 2, while the other cell lines showed no other deviations from the expected karyotypes.

(C) A second Ts19 cell line and a matched euploid control cell line were transduced with LTa, and then transduced a second time with an empty vector, Ras<sup>V12</sup>, BRAF<sup>V600E</sup>, or PIK3CA<sup>H1047R</sup>. All euploid/Ts19 pairs grew at approximately the same rates over the course of the experiment. Read depth analysis at passage 10 revealed several karyotypic alterations, including a gain of mChr2. Note that the growth curves displayed in A and B are also presented in Figure 3A and Figure S5. Deviations from each cell line's initial karyotype are indicated with an asterisk.

post-xenograft

pre-xenograft

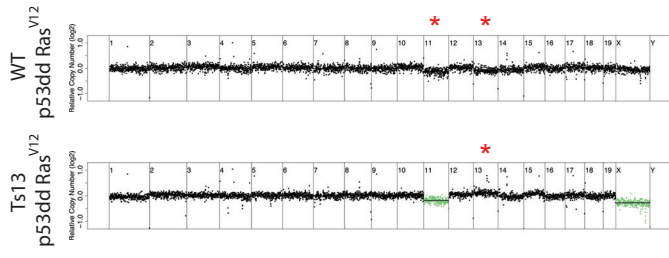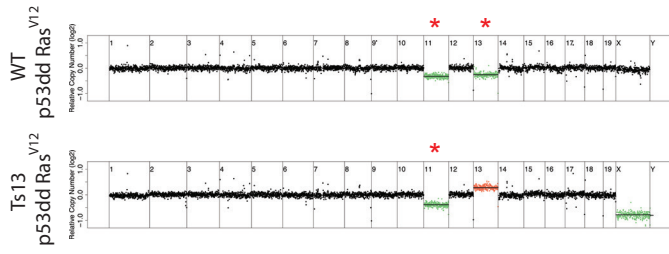

WT vs. Ts13

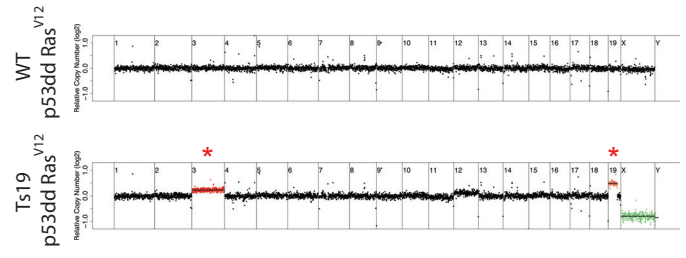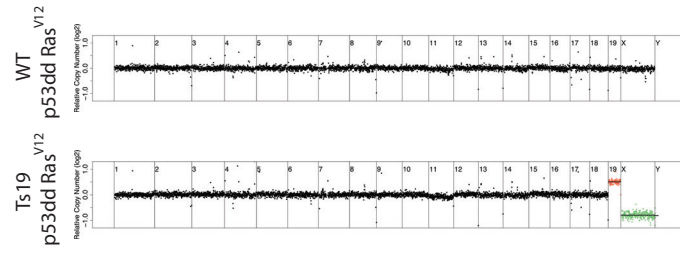

WT vs. Ts19

**Figure S8, related to Figure 7. Karyotype evolution of transformed MEFs during xenograft growth.**

Cell lines trisomic for mChr13 or mChr19, as well as matched euploid control cells, were transduced with p53dd and Ras<sup>V12</sup>, expanded for several passages to increase cell number, and then injected subcutaneously into nude mice. DNA from each cell line before and after xenograft growth was subjected to low-pass whole genome sequencing, and the derived karyotypes of each cell line are displayed. Deviations from each cell line's initial karyotype are indicated with an asterisk.

## **Supplemental Experimental Procedures**

### **MEF derivation, culture, and transduction**

A Robertsonian breeding scheme was utilized to generate sibling-matched euploid and trisomic MEFs as described in Williams et al., 2008. Note that due to the extreme fitness defect caused by the gain of chromosome 1, to date we have only been able to generate a MEF line from a single Ts1 embryo. Therefore, only single replicates of experiments involving this trisomy are displayed.

MEFs were cultured in DMEM supplemented with 10% FBS, 2mM glutamine, and 100 U/ml penicillin and streptomycin. Cells were maintained at 37° C and 5% CO<sub>2</sub> in a humidified environment. Cell counting was performed using the Cellometer Auto T4 system. Plasmids encoding oncogenes were obtained from Addgene (<https://www.addgene.org/>) and then transfected into the Phoenix-Eco cell line (Swift et al., 2001) using TransIT-LT1 (Mirus). Viral supernatants were collected 24, 48, and 72 hours post-transfection, and were applied to freshly-split passage 2 MEFs. Transduced cells were selected by FACS, or by the addition of puromycin (1.6 µg/ml), hygromycin (200 µg/ml), or G418 (1 mg/ml).

### **Human colon cancer cell culture**

Aneuploid cell lines derived from HCT116 cells were previously described in Stingle et al., 2012 and Donnelly et al., 2014. Cells were cultured in DMEM supplemented with 10% FBS, 2mM glutamine, and 100 U/ml penicillin and streptomycin. Cells were maintained at 37° C and 5% CO<sub>2</sub> in a humidified environment.

### **Low-pass whole genome sequencing**

Sequencing reactions were performed at the MIT BioMicro Center. 50 ng of purified DNA from each cell line were prepared and barcoded using Nextera reagents (Illumina), and tagmented material was PCR amplified for seven cycles. Libraries were quantified using an

AATI Fragment Analyzer before pooling. Libraries were sequenced (40bp read length) on an Illumina HiSeq2000. Reads were demultiplexed using custom scripts allowing single mismatches within the reference barcode.

Sequence reads were trimmed to 40 nucleotides and aligned to the mouse (mm9) or human (hg19) genomes using BWA (0.6.1) with default options (Li and Durbin, 2009). HMMcopy (0.1.1) was used to detect copy number alterations by estimating copy number in 500-kb bins controlling for mappability [downloaded from UCSC Genome Bioinformatics (<http://hgdownload.cse.ucsc.edu/goldenPath/hg19/encodeDCC/wgEncodeMapability/>) or (<http://hgdownload.cse.ucsc.edu/goldenPath/mm9/encodeDCC/wgEncodeMapability/>)] and GC content (calculated by HMMcopy gcCounter)(Ha et al., 2012).

### **Cell proliferation and tumorigenicity assays**

For proliferation assays, MEFs and HCT116 cells were passaged using a modified 3T3 protocol (Todaro and Green, 1963).  $3 \times 10^5$  cells were plated in three wells of a 6-well plate, and cells were combined, counted, and re-plated at the same density every third day. For focus formation assays, 1000 cells (MEFs) or 200 cells (HCT116) were plated in triplicate on 10cm plates, and then allowed to grow for 10 (MEFs) or 14 days (HCT116). Subsequently, colonies were fixed with ice-cold 100% methanol for 10 minutes, and then stained with a solution of 0.5% crystal violet in 25% methanol for 10 minutes. For soft agar assays, a 1% base layer of Difco Agar Noble was prepared and then mixed with an equal amount of 2X DMEM. The solution (0.5% agar in 1X DMEM) was then added to each well of a 6-well plate and allowed to solidify. Subsequently, a top layer of 0.7% agar was prepared and mixed with an equal volume of a 2X solution of DMEM containing 10,000 cells (MEFs) or 2000 cells (HCT116) and added to the base layer in triplicate. The plates were incubated for 20 days at 37° C prior to imaging.

For xenograft studies, 5 - 10 female, 5-week old Nu/J mice (Jackson Laboratory Stock 002019) were utilized for each experiment. Cells to be injected were harvested and



concentrated to  $10^7$  (MEFs) or  $4 \times 10^7$  (HCT116) cells/ml in PBS. 100 $\mu$ l of the solution was injected subcutaneously into the rear flanks of each mouse using a 25 gauge needle. Euploid and aneuploid cell lines were typically injected contralaterally, with the exception of experiments involving cell lines transduced with LTa and Ras<sup>V12</sup>, in which only one cell line was injected into each animal. Tumor dimensions were measured every third day using calipers, and tumor volumes were calculated using the formula  $0.5 \times A \times B^2$ , where A is the longer diameter and B is the shorter diameter. H&E staining of paraformaldehyde-fixed sections was performed according to standard methods. All animal studies and procedures were approved by the MIT Institutional Animal Care and Use Committee.

### **Immunoblotting**

Cells were lysed with RIPA buffer (50 mM Tris-HCl at pH7.4, 150 mM NaCl, 5 mM MgCl<sub>2</sub>, 1% Triton X-100, 0.5% NP-40, 10% glycerol, protease inhibitor cocktail [Roche], phosphatase inhibitor cocktail [Roche]). The lysate was run on a 12% (Myc) or 14% (p53dd) SDS-PAGE gel and transferred to a nitrocellulose membrane. The membrane was then probed with the following primary antibodies: anti-c-Myc (Abcam, ab32072), anti-p53 (Santa Cruz Biotechnology, sc-6243), or anti- $\beta$ -actin (Sigma-Aldrich, A2228). The following secondary antibodies were used: HRP anti-rabbit (GE Healthcare, NA934V) or HRP anti-mouse (GE Healthcare, NA9310V). The protein was then detected using enhanced chemiluminescence (GE Healthcare, RPN2232).

### **$\beta$ -galactosidase staining**

5000 cells of each cell line were plated in triplicate in a 48-well plate, allowed to attach overnight, and then stained using a Senescence Histochemical Staining Kit (Sigma-Aldrich). Cells were incubated in the X-gal solution overnight at 37° C prior to imaging on a Nikon Eclipse TE2000.

## Competition experiments

To directly compare the fitness of the aneuploid and near-euploid HCT116 cell lines, we mixed equal numbers of GFP+ aneuploid HCT116 with a GFP+ DsRed+ near-euploid HCT116 line. Every third day, the cells were trypsinized, replated, and an aliquot was removed for analysis on a MacsQuant Analyzer 10 (Milltenyi Biotec).

## Supplemental References

Ha, G., Roth, A., Lai, D., Bashashati, A., Ding, J., Goya, R., Giuliany, R., Rosner, J., Oloumi, A., Shumansky, K., et al. (2012). Integrative analysis of genome-wide loss of heterozygosity and monoallelic expression at nucleotide resolution reveals disrupted pathways in triple-negative breast cancer. *Genome Res.* 22, 1995–2007.

Li, H., and Durbin, R. (2009). Fast and accurate short read alignment with Burrows–Wheeler transform. *Bioinformatics* 25, 1754–1760.

Swift, S., Lorens, J., Achacoso, P., and Nolan, G.P. (2001). Rapid production of retroviruses for efficient gene delivery to mammalian cells using 293T cell-based systems. *Curr. Protoc. Immunol.* Ed. John E Coligan AI *Chapter 10*, Unit 10.17C.

Todaro, G.J., and Green, H. (1963). Quantitative Studies of the Growth of Mouse Embryo Cells in Culture and Their Development into Established Lines. *J. Cell Biol.* 17, 299–313.
